# Supplementary material for: Testing the Effects of Prey Type on the Life History and Population-Level Parameters of Chrysoperla externa (Neuroptera: Chrysopidae)
Source: MDPI journal article supplement (doi:10.3390/insects15050330), 2024-05-03

Figure S1. Prey items offered to *Chrysoperla externa* larvae for consumption: (a) *Diatraea saccharalis* eggs, (b) *Leucoptera coffeella* pupae, and (c) *Ephesia kuehniella* eggs.

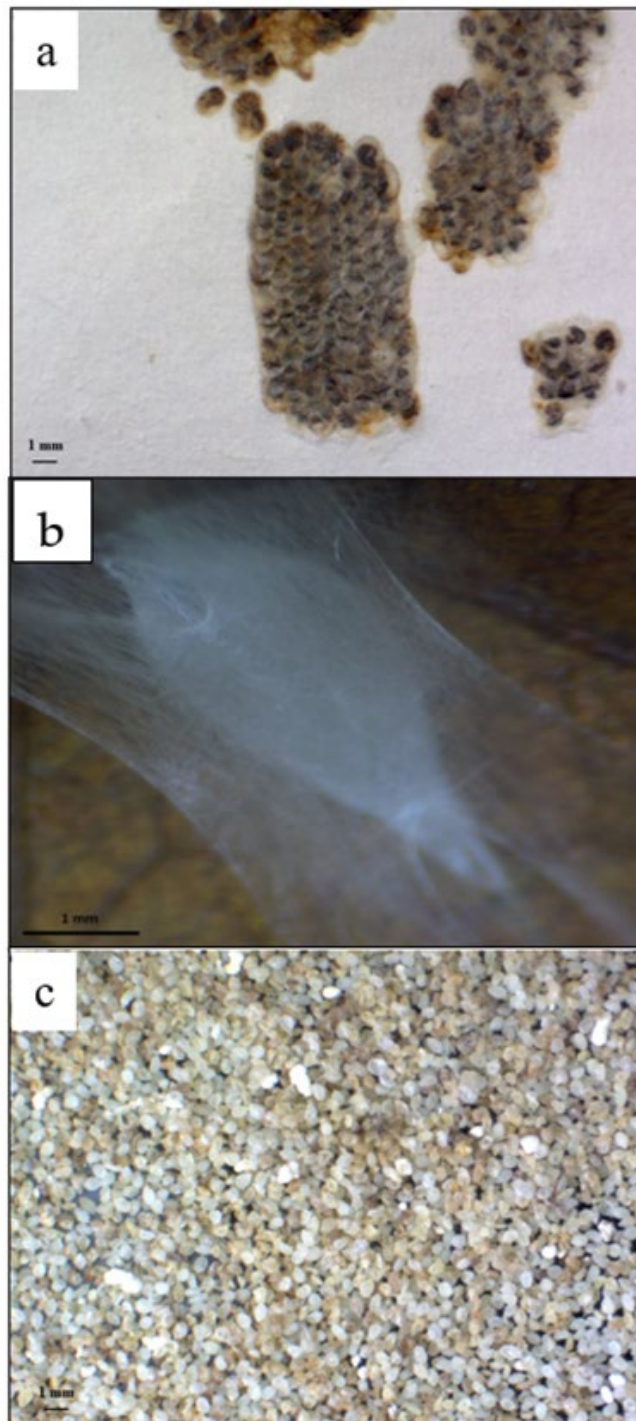

Supplement: s1 [file s1]
